# Supplementary material for: Histidine-rich branched peptides as Cu(ii) and Zn(ii) chelators with potential therapeutic application in Alzheimer's disease
Source: Royal Society of Chemistry journal article supplement (doi:10.1039/c1dt10989h), 2011-12-13
Supplement: c1dt10989h.pdf [file c1dt10989h.pdf]

## Supplementary information

### **Histidine-rich branched peptides as Zn(II) and Cu(II) chelators with potential therapeutic application in Alzheimer's disease**

Andrea Lakatos<sup>\*</sup>, Béla Gyurcsik, Nóra V. Nagy, Zita Csendes, Edit Wéber, Lívia Fülöp,  
Tamás Kiss<sup>\*</sup>

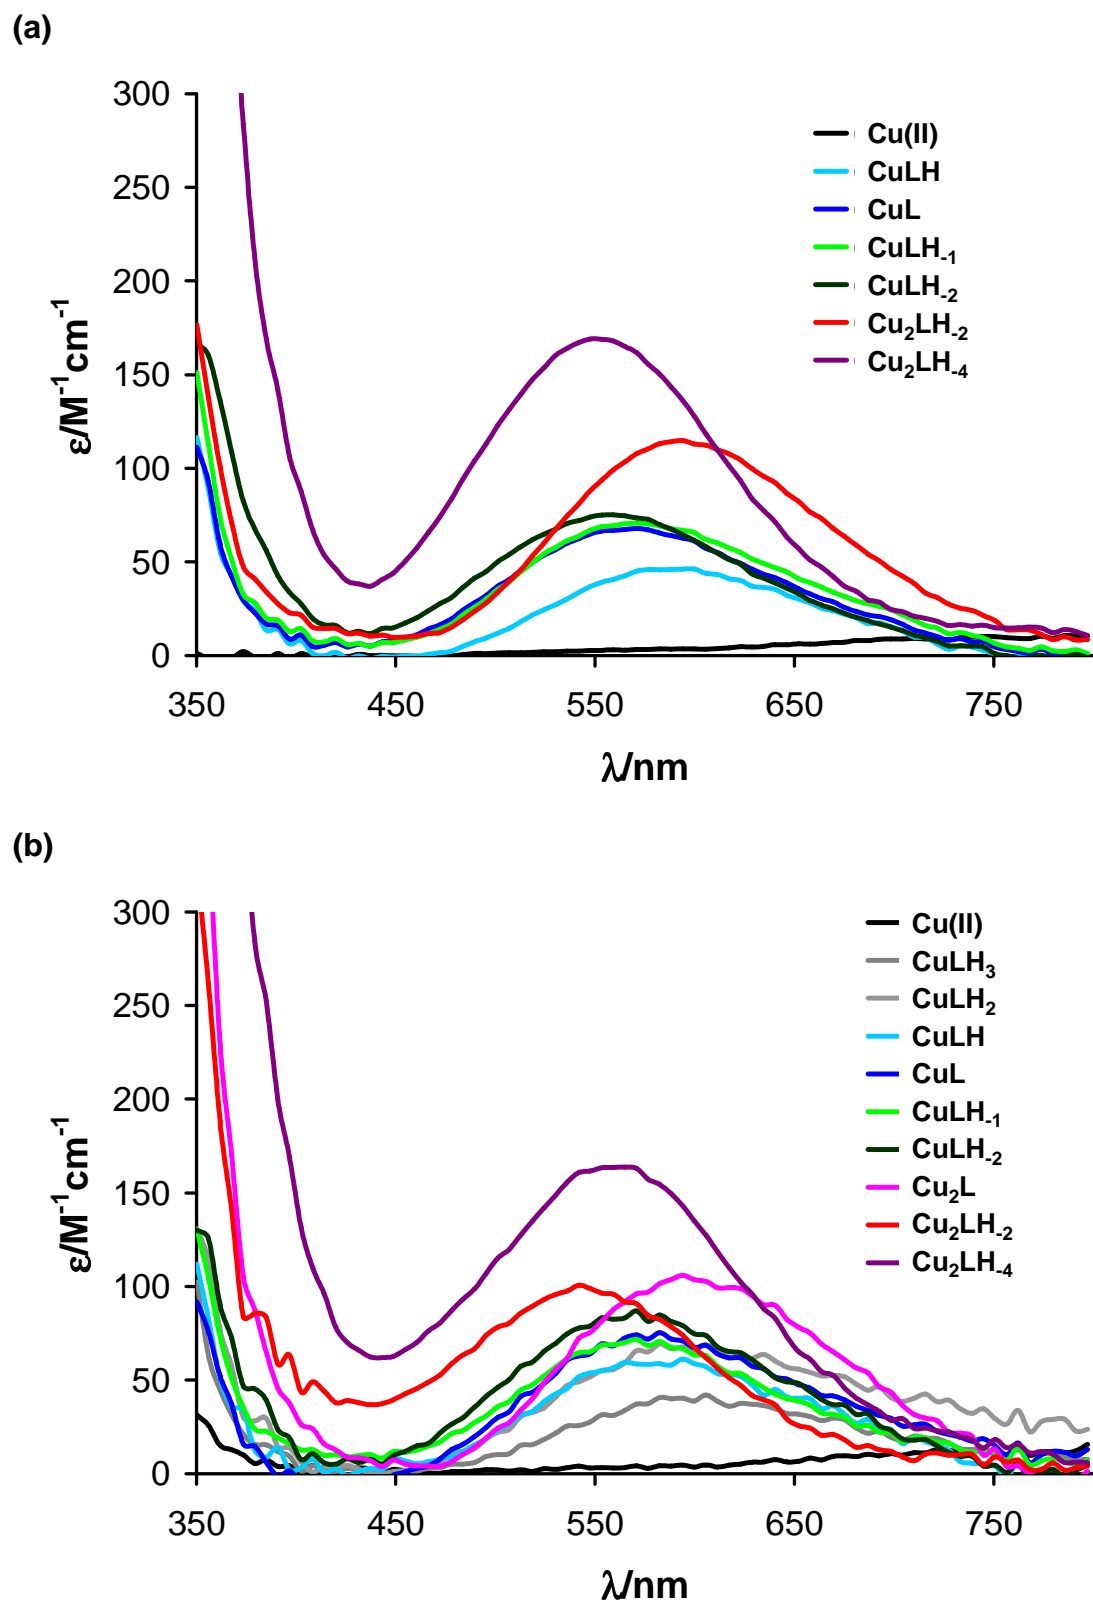

**Figure S1.** Molar absorption spectra of the Cu(II) complexes formed with (GH)<sub>2</sub>K (a) and (HH)<sub>2</sub>K (b).

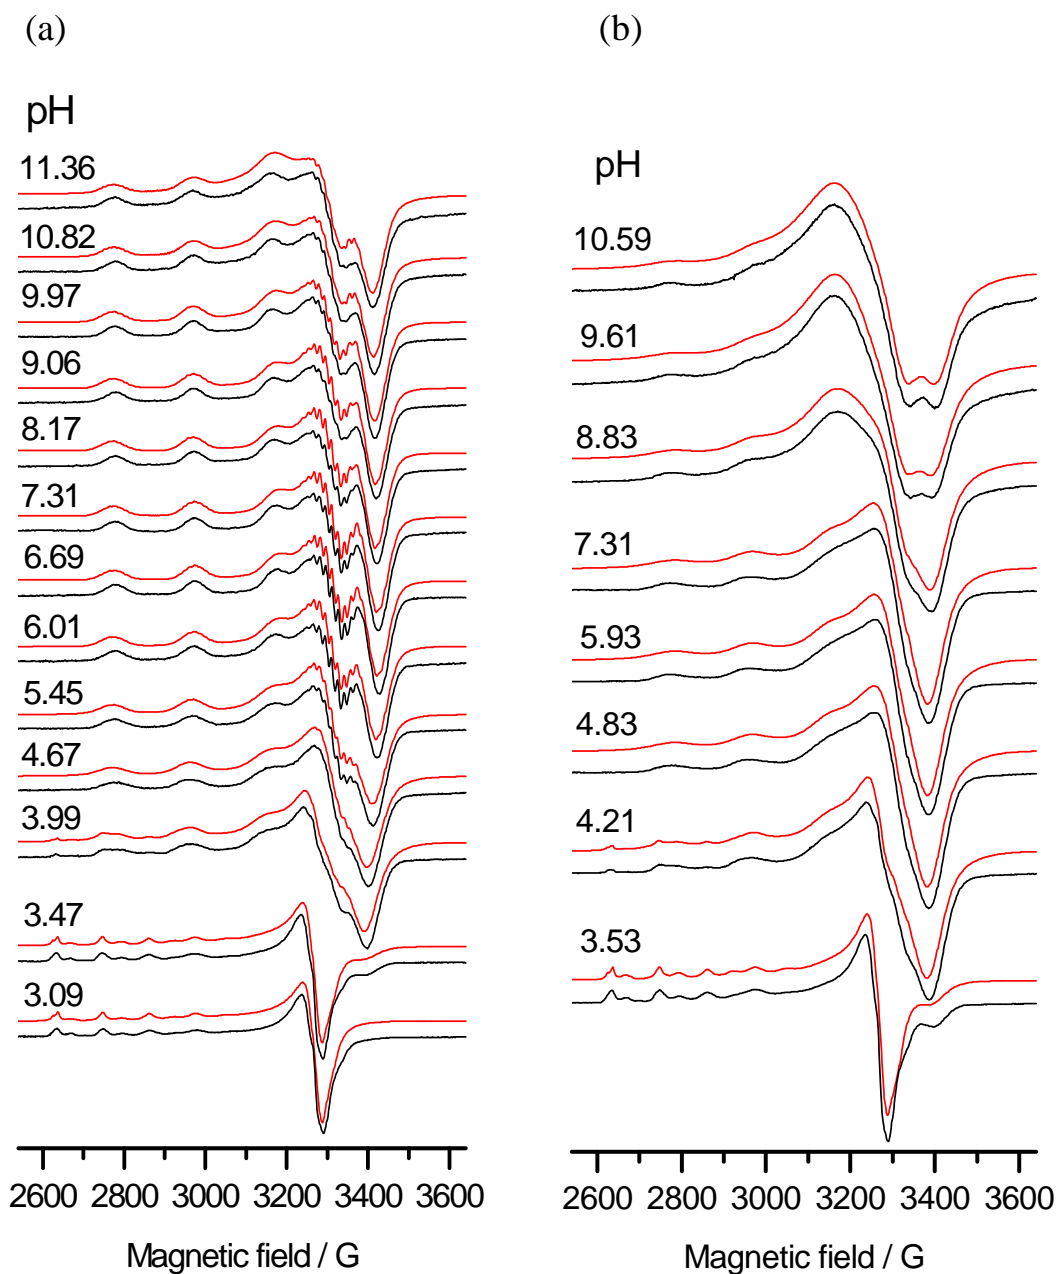

**Figure S2.** Anisotropic EPR spectra recorded at (a)  $c_{\text{Cu}} = 1 \text{ mM}$  and  $c_{\text{L}} = 1 \text{ mM}$ , and (b)  $c_{\text{Cu}} = 2 \text{ mM}$  and  $c_{\text{L}} = 1 \text{ mM}$ , at 77 K for  $(\text{GH})_2\text{K} - \text{Cu}(\text{II})$  system. Measured spectra (black) together with the simulated curves (red) (The maximum amplitude of all spectrum were normalized to one).

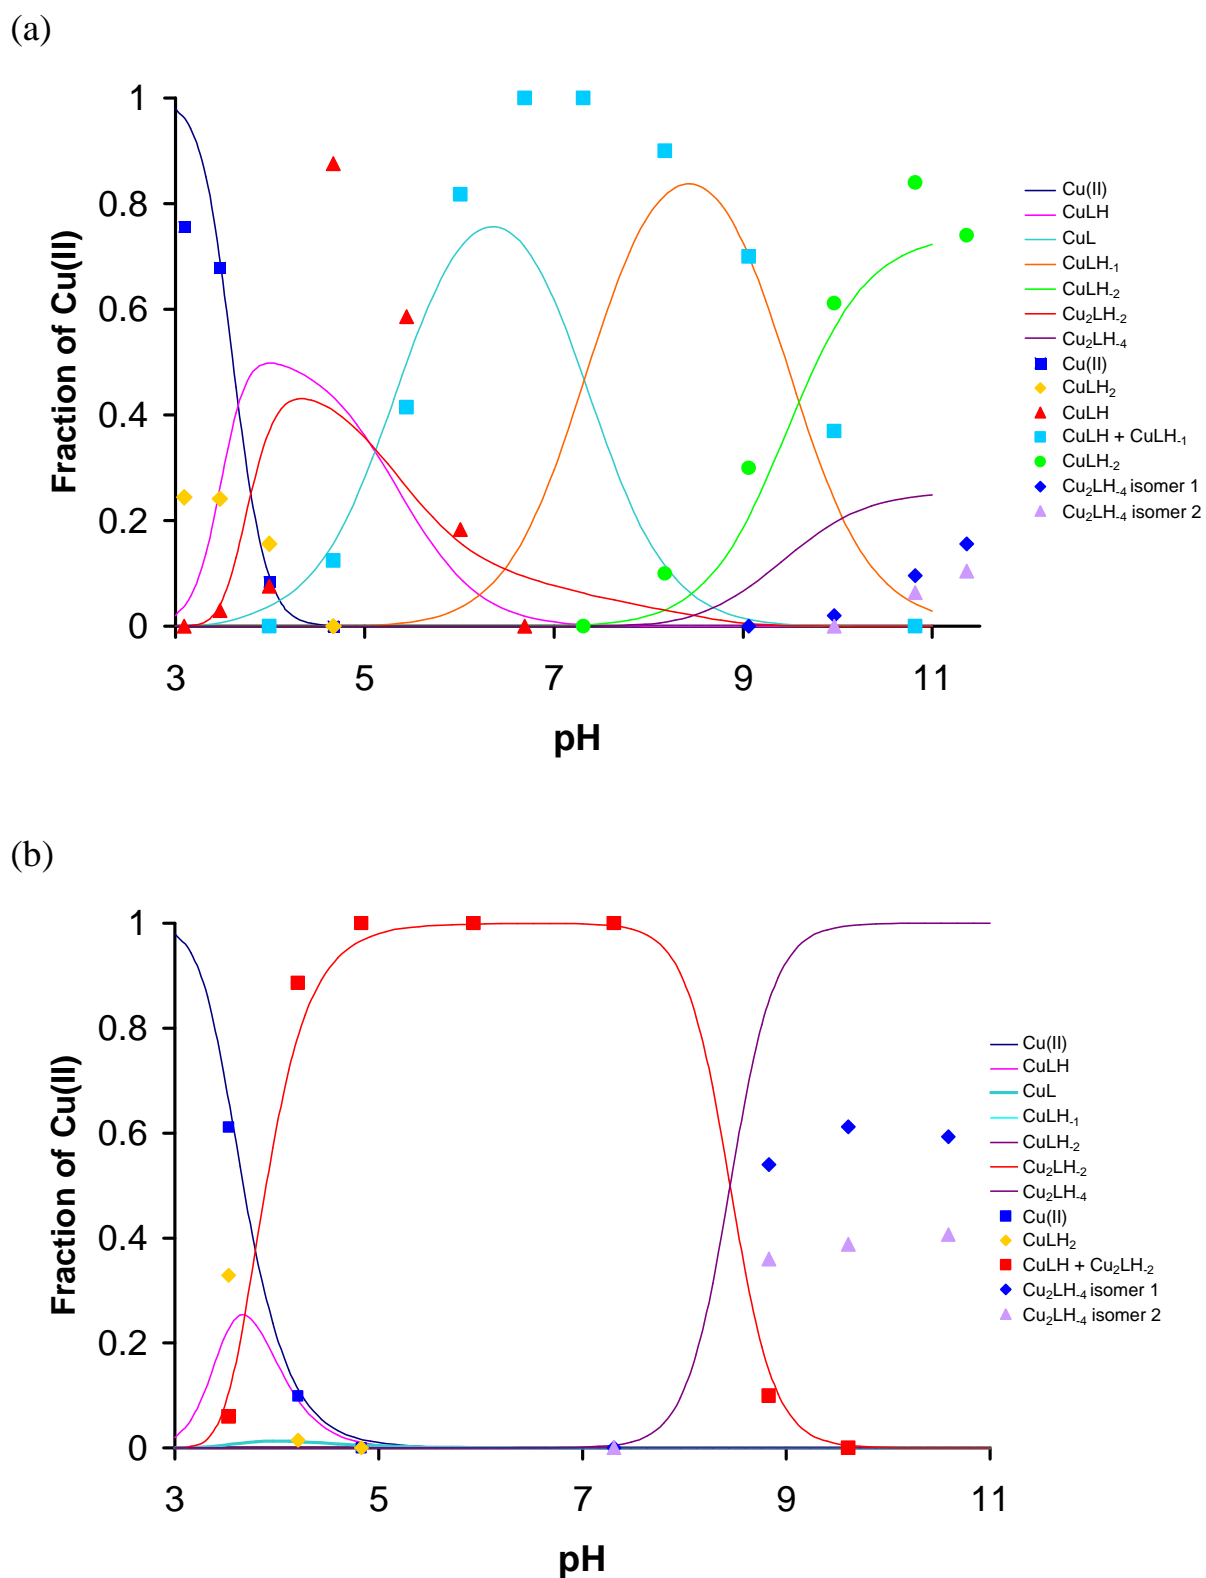

**Figure S3.** Comparison of the species distribution curves for L = (GH)<sub>2</sub>K (a)  $c_{\text{Cu(II)}} = 1 \text{ mM}$  and  $c_{\text{L}} = 1 \text{ mM}$  (b)  $c_{\text{Cu(II)}} = 2 \text{ mM}$  and  $c_{\text{L}} = 1 \text{ mM}$  obtained from pH-potentiometry (lines) and from the simulation of anisotropic EPR spectra (symbols)

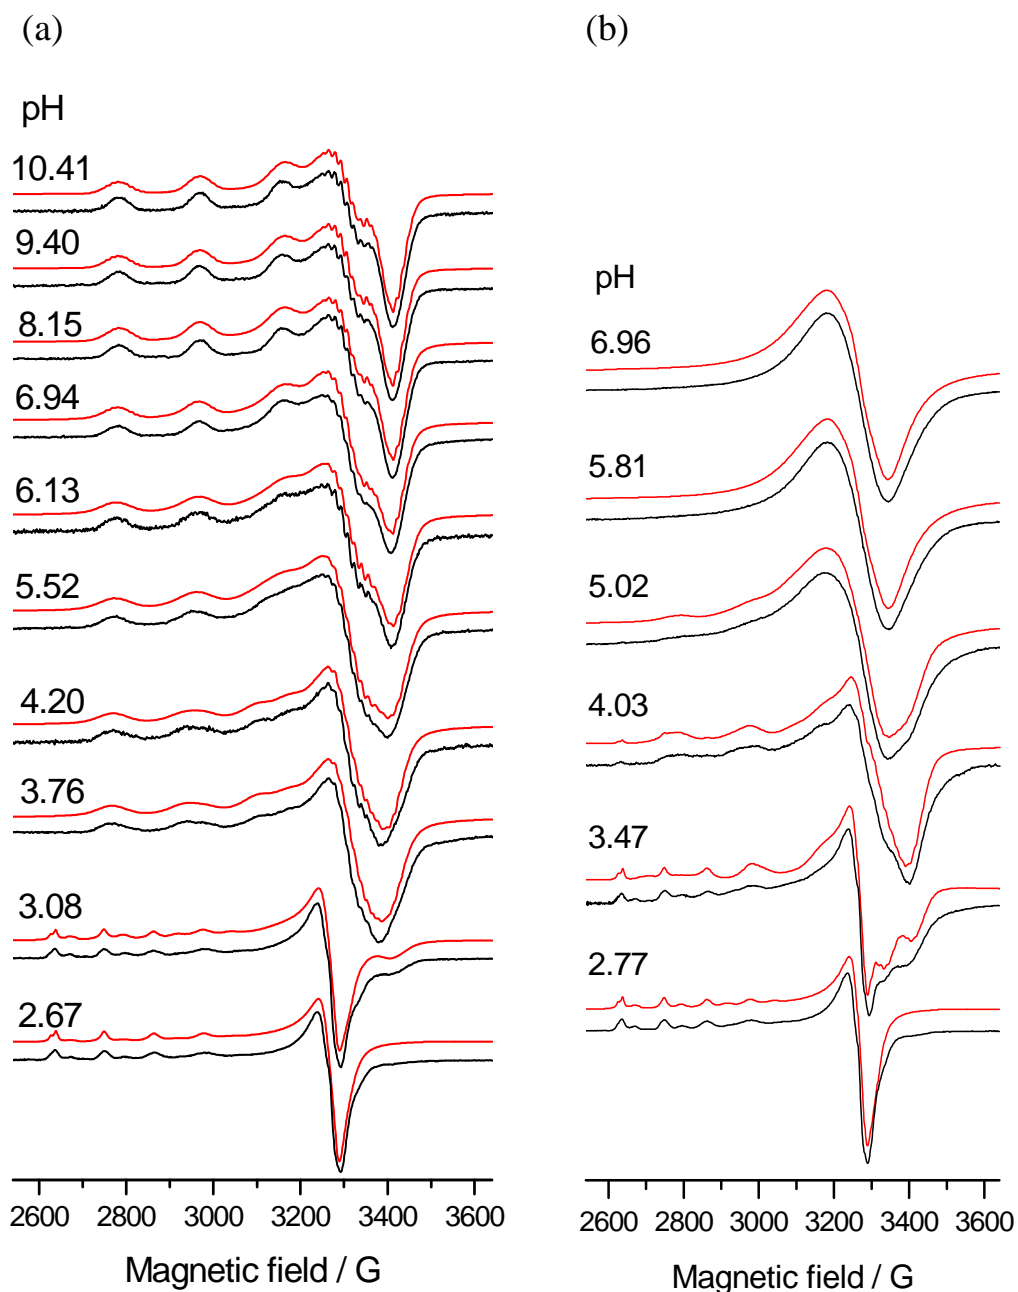

**Figure S4.** Anisotropic EPR spectra recorded at (a)  $c_{\text{Cu}} = 1 \text{ mM}$  and  $c_{\text{L}} = 1 \text{ mM}$ , and (b)  $c_{\text{Cu}} = 2 \text{ mM}$  and  $c_{\text{L}} = 1 \text{ mM}$ , at 77 K for  $(\text{HH})_2\text{K} - \text{Cu}(\text{II})$  system. Measured spectra (black) together with the simulated curves (red) (The maximum amplitude of all spectrum were normalized to one).

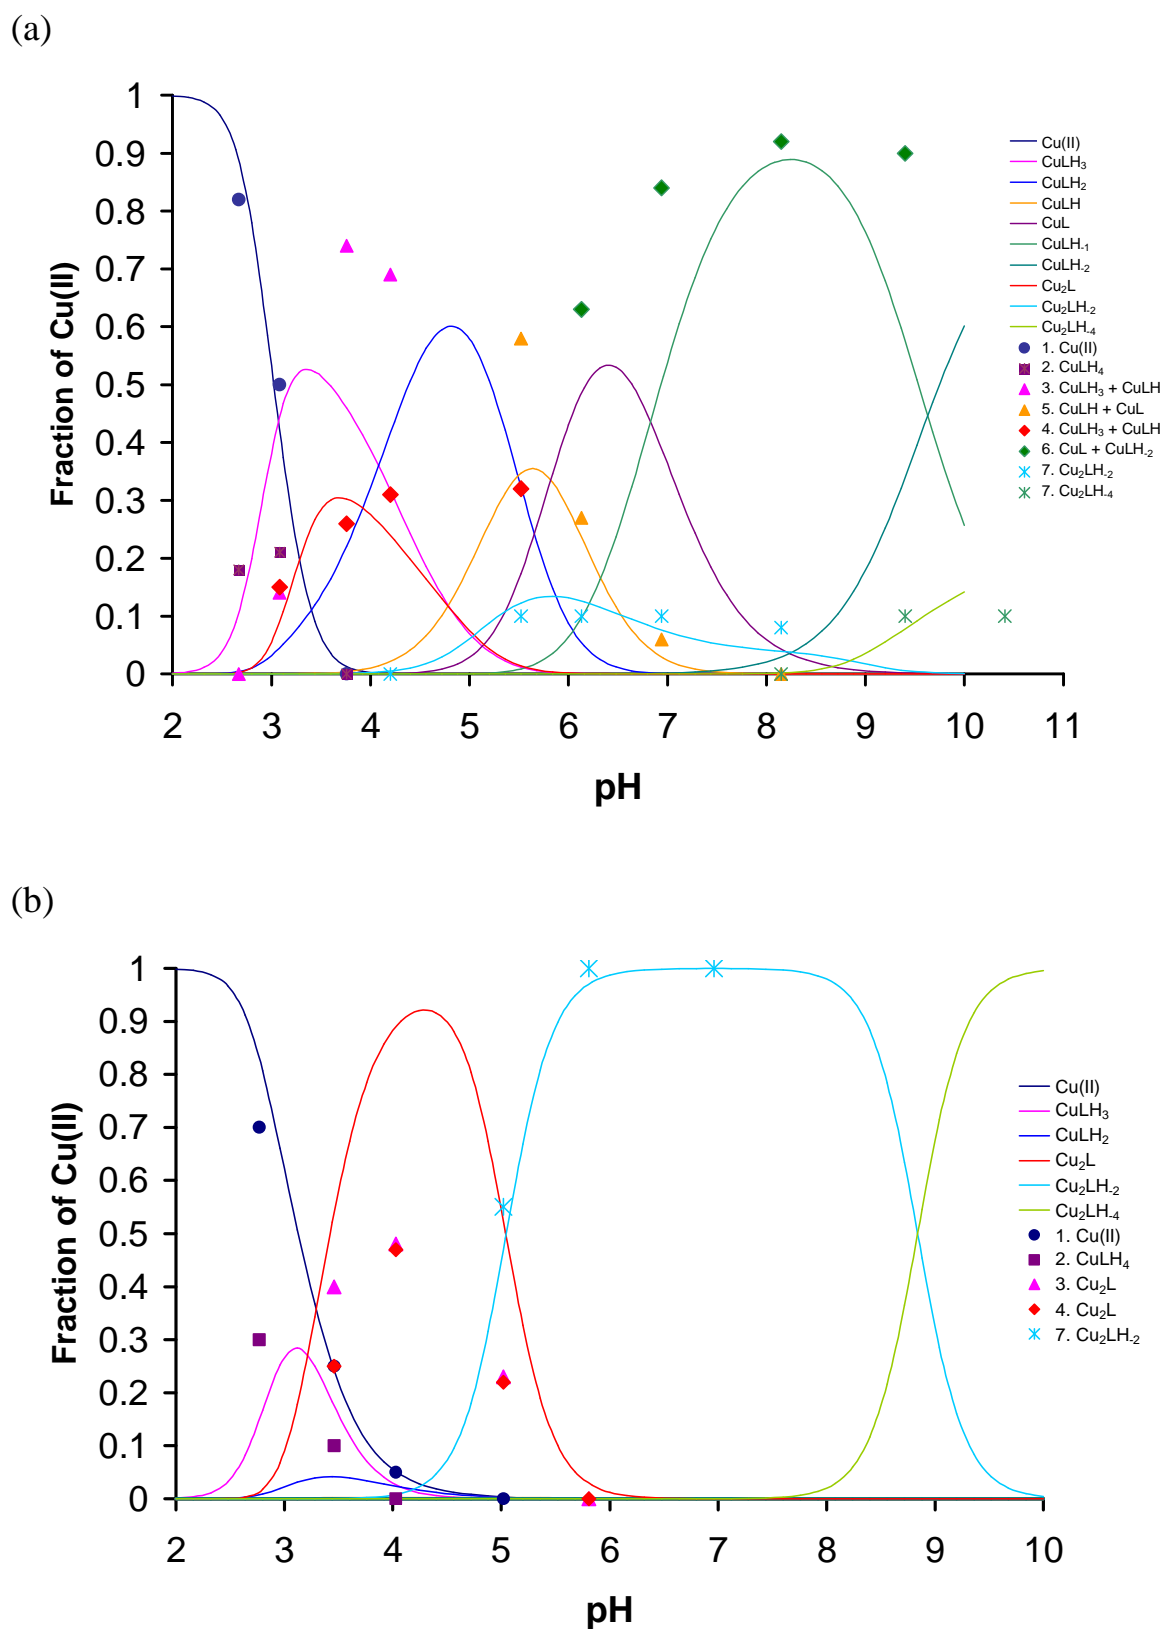

**Figure S5.** Comparison of the species distribution curves for L = (HH)<sub>2</sub>K (a)  $c_{\text{Cu(II)}} = 1 \text{ mM}$  and  $c_{\text{L}} = 1 \text{ mM}$  (b)  $c_{\text{Cu(II)}} = 2 \text{ mM}$  and  $c_{\text{L}} = 1 \text{ mM}$  obtained from pH-potentiometry (lines) and from the simulation of anisotropic EPR spectra (symbols)
